# Supplementary material for: Phenylethynylanthracene based push–pull molecular systems: tuning the photophysics through para-substituents on the phenyl ring
Source: Royal Society of Chemistry journal article supplement (doi:10.1039/d2cp05074a), 2022-12-09
Supplement: d2cp05074a1.pdf [file d2cp05074a1.pdf]

## Supporting Information

### **Phenylethynylantracene Based Push-Pull Molecular Systems: Tuning the Photophysics Through *Para*-substituent on the Phenyl Ring**

Sonali Sahu, Parthasarathy Venkatakrishnan\* and Ashok Kumar Mishra\*  
*Department of Chemistry, Indian Institute of Technology Madras, Chennai 600036, Tamil Nadu, India*

## Experimental Details.

**Synthetic Specifications.** All the reagents were used as received without further purification. THF was dried and distilled over sodium-ketyl radical system. Triethylamine (TEA) and DMF were distilled using potassium hydroxide and calcium hydride, respectively. For reactions, clean oven-dried glasswares were used. The progress of the reactions was monitored by thin layer chromatography (TLC) using Merck silica-gel (60 F<sub>254</sub>) precoated plates (0.25 mm) and the compound spot were seen with naked eye under a UV lamp (365 or 254 nm). The crude product obtained was then purified by column chromatography using silica gel (100-200 mesh). A mixture of hexane and chloroform was used as the eluent. Melting points of the compounds were measured by the open capillary method and the values were corrected. JASCO FT/IR-4100 spectrometer was used for recording the infrared spectra. <sup>1</sup>H (400 MHz) and <sup>13</sup>C (100/125 MHz) NMR spectra were recorded using a Bruker Avance FT-NMR (400 and 500 MHz) spectrometer using CDCl<sub>3</sub> with TMS as the internal reference. The reported <sup>1</sup>H NMR and <sup>13</sup>C spectra were calibrated with the residual proton solvent peak (CDCl<sub>3</sub>, δ = 7.26 ppm) and residual carbon solvent peak (CDCl<sub>3</sub>, δ = 77.16 ppm), respectively. High resolution Q-TOF mass spectrometer was used to obtain the High-resolution mass spectra.

**Photophysical Studies.** For this, all the solvents used were of spectroscopic grade. Stock solutions of 10<sup>-3</sup> M for all compounds were prepared in DCM. Then the experimental samples were prepared by evaporating DCM from the required amount of stock solution by purging nitrogen gas and then adding the desired solvent in it. The molar extinction coefficients (ε) were calculated by taking three independent measurements at three different concentrations of the analyte with standard deviations ≤ 4 %.

**Instrumentation.** UV-visible absorption spectra were recorded with the help of a Shimadzu UV-2600 spectrophotometer using a quartz cuvette (path length 1 cm). The steady state fluorescence and anisotropy measurements were done using a Horiba Jobin-Yvon FluoroMax-4 fluorescence spectrophotometer with a 150 W xenon lamp as light source. To maintain the temperature of the fluorimeter cuvette holder, a CORIO CD-300F refrigerated/heating circulator from Julabo was used. Fluorescence lifetime measurements and anisotropy decay studies were carried out using a Horiba Jobin Yvon Fluorocube lifetime instrument with time-correlated single photon counting set up in reverse mode. The instrument response function (IRF) was collected using Ludox AS40 colloidal silica solution. The decays were analysed using IBH DAS6 software. A fit with  $0.99 \leq \chi^2 \leq 1.30$  was considered as a good fit.

**Quantum Yield Measurements.** The fluorescence quantum yield ( $\phi$ ) of all the derivatives was measured using the following relation:

$$\phi_u = \phi_r \frac{F_u A_r \eta_u^2 q_r}{F_r A_u \eta_r^2 q_u} \quad (\text{S1})$$

where, ‘F’ represents the corrected fluorescence peak area, ‘A’ the absorbance at the excitation wavelength, ‘ $\eta$ ’ the refractive index of the solvent used, ‘q’ the excitation light intensity, and the subscripts “r” and “u” refer to reference and unknown respectively. For calculating  $\phi$  all the compounds in cyclohexane and MeCN, Coumarin 30 ( $\phi = 0.67$  at 380 nm in MeCN) was used as a reference standard. For calculating  $\phi$  of **AnPNO<sub>2</sub>** in 1,4-dioxane and THF, Perylene ( $\phi = 0.94$  at 410 nm in cyclohexane) was used as a reference standard. The radiative ( $k_r$ ) and non-radiative ( $k_{nr}$ ) rate constants were calculated using the formulae:

$$k_r = \frac{\phi}{\tau} \quad (\text{S2}) \quad \text{and} \quad k_{nr} = \frac{1}{\tau} - k_r \quad (\text{S3})$$

The  $\phi$  values were calculated as the means of three independent measurements with standard deviations  $\leq 3$  %.

**Theoretical Calculations.** The computational calculations were performed using Gaussian 16 computational package. Optimization of ground state of the compounds was carried out using density functional theory (DFT) with B3LYP hybrid functional and 6-311+g(d,p) basis set without any symmetry constrains. Vibrational analyses were carried out to ascertain the absence of imaginary frequencies. The effect of solvent was included through self-consistent reaction field (SCRF) using polarizable continuum model (PCM). Excited state geometries were also optimized using B3LYP/6-311+g(d,p) combination. Potential energy surface (PES) scans were done using Relaxed redundant coordinate scan system using B3LYP/6-311+g(d,p). TD-DFT calculations for both absorption and emission were done using CAM-B3LYP functional and the same basis set. Electron density difference (EDD) between excited state and ground state [ $\Delta\rho(r) = \rho^{S_1}(r) - \rho^{S_0}(r)$ ] were calculated using Multiwfn software where  $\rho^{S_1}$  and  $\rho^{S_0}$  must have the same geometry.  $\Delta\rho$  can be divided into positive ( $\rho^+$ ) and negative ( $\rho^-$ ) parts, which indicate the regions where electron density has increased and decreased

respectively, after excitation.  $t$ -index is a measure of CT character in a molecule and is given by:<sup>1</sup>

$$t \text{ index} = D \text{ index} - H_{CT} \quad (\text{S4})$$

Where D index (or  $d_{CT}$ ) is the distance between the two barycenters of  $\rho^+$  and  $\rho^-$  or the total CT length and  $H_{CT}$  is the average degree of spatial extension of  $\rho^+$  and  $\rho^-$  in CT direction. If  $t$ -index is less than 0, it means that  $\rho^+$  and  $\rho^-$  are not considerably separated due to CT. A positive value of  $t$ -index implies a significant separation of  $\rho^+$  and  $\rho^-$  distributions due to CT and the transition should be identified as a typical CT transition.

**Dipole Moment Change using Lippert-Mataga Equation.** To understand the solvent polarity effect, the Lippert-Mataga equation<sup>2</sup> was used to correlate Stokes shift ( $\Delta\bar{\nu}$ ) with orientation polarizability ( $\Delta f$ ), which is given by:

$$\bar{\nu}_a - \bar{\nu}_f = \frac{2}{hc} \left( \frac{\epsilon - 1}{2\epsilon + 1} - \frac{n^2 - 1}{2n^2 + 1} \right) \frac{(\mu_E - \mu_G)^2}{a^3} + \text{constant} \quad (\text{S5})$$

Where  $\bar{\nu}_a$  and  $\bar{\nu}_f$  are the wavenumbers ( $\text{cm}^{-1}$ ) corresponding to the absorption and the emission, respectively,  $h$  is the Planck's constant,  $c$  is the speed of light, and ' $a$ ' is the radius of the solvent cavity in which the fluorophore resides. The equation involves both the dielectric constant ( $\epsilon$ ) and the refractive index ( $n$ ) of the solvents. ' $a$ ' was calculated as half of the length of the molecule in the optimised geometry using B3LYP/6-311+g(d,p).

**Fluorescence Anisotropy Studies.** Fluorescence anisotropy value ( $r$ ) is given by the equation:<sup>3</sup>

$$r = \frac{I_{\parallel} - I_{\perp}}{I_{\parallel} + 2I_{\perp}} \quad (\text{S6})$$

Where  $I_{\parallel}$  and  $I_{\perp}$  are intensities of the emitted light parallel and perpendicular to the direction of the polarized excitation light, respectively. Time-resolved fluorescence anisotropy is given by:

$$r(t) = r_{\infty} + (r_0 - r_{\infty}) \exp(-t/\theta) \quad (\text{S7})$$

Where  $r_0$ ,  $r_{\infty}$  and  $\theta$  are the fundamental anisotropy, limiting/residual anisotropy and rotational correlation time. If the molecule is totally free to rotate, a  $r_{\infty}$  value of zero is obtained. If there

is hindered rotation i.e., the fluorophore is not fully free to rotate, a non-zero limiting anisotropy value is obtained.

**Electrochemical Studies.** Electrochemical measurements were done at room temperature ( $25 \pm 1$  °C) using the electrochemical workstation (CH Instruments 660A) at a scan rate of 0.1 V/s using three electrode system i.e., glassy carbon as working electrode, platinum wire as counter electrode and Ag/AgCl, KCl (saturated) as reference electrode. All the experiments were done in distilled and nitrogen-purged acetonitrile (MeCN) as the solvent using tetra-*n*-butylammonium hexafluorophosphate ( $[n\text{-Bu}_4\text{N}][\text{PF}_6]$ , 0.1 M) as the non-aqueous supporting electrolyte. All the cyclic voltammograms were calibrated using ferrocene (Fc) as the internal standard for each experiment and were corrected. The concentration of the analyte dyes was *ca.* 1 mM.

**Preparation of WLE PVA Gel.** The WLE solution in DMSO was prepared from **AnPCN** and **AnPNMe<sub>2</sub>**. Then water was added to it so as to make the DMSO to water ratio 9:1 (v/v). After that, 12% (w/v) Polyvinyl alcohol (PVA) was added and the whole solution was stirred at 70 °C until all the PVA dissolved resulting in a transparent solution.<sup>4</sup> Then it was immediately kept at 4 °C. The gel started forming after the solution cools down. The forming gel was kept at the same temperature (4 °C) for 2 days. Then it was used for experiments.

*General procedure for Sonogashira Coupling:* To an oven-dried two-neck round bottomed flask equipped with reflux condenser and a magnetic stir-bar, 9-bromoanthracene (1.0 equivalent) and a solvent mixture of THF and TEA (2:1, v/v) (or DMF and TEA mixture, 2:1, v/v) were added. The resulting solution was degassed with nitrogen gas for 5 minutes. Then the corresponding alkyne (1.0 equivalent), CuI (5 mol %) and the catalyst Pd(PPh<sub>3</sub>)<sub>2</sub>Cl<sub>2</sub> (4 mol % relative to the bromo derivative) were added carefully and the whole solution was again degassed with nitrogen gas for 15 minutes. Then the temperature was raised to 70 °C and stirring was continued for about 10-12 hours. The progress of the reaction was monitored using TLC. After the disappearance of the alkyne starting material, the reaction contents were cooled to room temperature, the solvents were evaporated, water was added and the organic contents were extracted with chloroform or ethyl acetate (3 times). The combined organic layer was washed with brine solution, dried over anhydrous sodium sulphate, filtered and the solvent was evaporated. The crude product was purified by silica-gel column chromatography using hexane and chloroform as the eluting solvents.

#### *9-(Phenylethynyl)anthracene (AnP)*

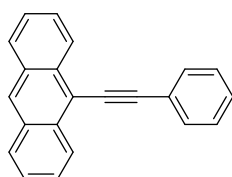

9-Bromoanthracene (0.35 g, 1.36 mmol) and ethynylbenzene (0.3 mL, 2.72 mmol) were Sonogashira-coupled in presence of Pd(PPh<sub>3</sub>)<sub>2</sub>Cl<sub>2</sub> (0.048 g, 0.068 mmol) and CuI (0.013 g, 0.068 mmol) in THF (4 mL) and TEA (2 mL) solvent mixture (2:1, v/v) at 70 °C. Time: 12 h. Yield: 0.358 g, 95%. Yellow Crystalline Solid. Mp: 106-108 °C. TLC: R<sub>f</sub> = 0.55 in hexane. <sup>1</sup>H NMR (400 MHz, CDCl<sub>3</sub>) δ: 8.66 (d, *J* = 8.8 Hz, 2H), 8.45 (s, 1H), 8.03 (d, *J* = 8.4 Hz, 2H), 7.78 (d, *J* = 6.8 Hz, 2H), 7.61 (t, *J* = 6.8 and 8.4 Hz, 2H), 7.52 (t, *J* = 7.6 Hz, 2H), 7.48-7.40 (m, 3H). <sup>13</sup>C NMR (100 MHz, CDCl<sub>3</sub>) δ: 132.8, 131.8, 131.3, 128.8, 128.7, 128.6, 127.9, 126.9, 126.7, 125.8, 123.8, 117.4, 100.9, 86.5. IR (KBr, cm<sup>-1</sup>): 3052, 2955, 2922, 2852, 2197, 1656, 1623, 1582, 1462, 1084, 879, 849, 734. HR ESI-MS: [C<sub>22</sub>H<sub>14</sub>]<sup>+</sup> = [M]<sup>+</sup> calculated *m/z* = 278.1096; found *m/z* = 278.1086.

*Methyl 4-(anthracen-9-ylethynyl)benzoate (AnPCO<sub>2</sub>Me)*

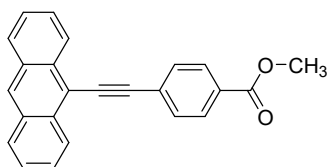

9-Bromoanthracene (0.35 g, 1.36 mmol) and methyl 4-ethynylbenzoate (0.24 g, 1.50 mmol) were Sonogashira-coupled in presence of Pd(PPh<sub>3</sub>)<sub>2</sub>Cl<sub>2</sub> (0.048 g, 0.068 mmol) and CuI (0.013 g, 0.068 mmol) in THF (4 mL) and TEA (2 mL) solvent mixture (2:1, v/v) at 70 °C. Time: 12 h. Yield: 0.421 g, 92%. Yellow Crystalline Solid. Mp: 178-180 °C. TLC: R<sub>f</sub> = 0.31 (4:1, hexane/chloroform). <sup>1</sup>H NMR (400 MHz, CDCl<sub>3</sub>) δ: 8.63 (d, *J* = 8.4 Hz, 2H), 8.47 (s, 1H), 8.12 (d, *J* = 8.4 Hz, 2H), 8.04 (d, *J* = 8.4 Hz, 2H), 7.83 (d, *J* = 8.0 Hz, 2H), 7.63 (t, *J* = 7.6 Hz, 2H), 7.53 (t, *J* = 8.0 and 7.2 Hz, 2H), 3.97 (s, 3H). <sup>13</sup>C NMR (100 MHz, CDCl<sub>3</sub>) δ: 166.7, 132.9, 131.6, 131.3, 129.8, 129.7, 128.9, 128.6, 128.4, 127.0, 126.7, 125.9, 116.7, 100.0, 89.5, 52.4. IR (KBr, cm<sup>-1</sup>): 3018, 2956, 2917, 2848, 2195, 1720, 1703, 1655, 1638, 1461, 1332, 1282, 935, 763, 727, 690, 640, 621. HR ESI-MS: [C<sub>24</sub>H<sub>16</sub>O<sub>2</sub>]<sup>+</sup> = [M]<sup>+</sup> calculated *m/z* = 336.1150; found *m/z* = 336.1156.

*4-(Anthracen-9-ylethynyl)benzotrile (AnPCN)*

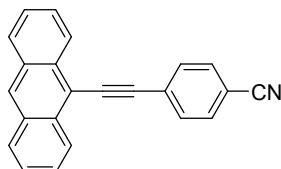

9-Bromoanthracene (0.1 g, 0.39 mmol) and 4-ethynylbenzotrile (0.059 g, 0.467 mmol) were Sonogashira-coupled in presence of Pd(PPh<sub>3</sub>)<sub>2</sub>Cl<sub>2</sub> (0.01 g, 0.014 mmol) and CuI (0.007 g, 0.037 mmol) in THF (2 mL) and TEA (1 mL) solvent mixture (2:1, v/v) at 70 °C. Time: 12 h. Yield: 0.058 g, 50%. Yellow Crystalline Solid. Mp: 170-172 °C. TLC: R<sub>f</sub> = 0.28 (4:1, hexane/chloroform). <sup>1</sup>H NMR (400 MHz, CDCl<sub>3</sub>) δ: 8.59 (d, *J* = 8.4 Hz, 2H), 8.51 (s, 1H), 8.05 (d, *J* = 8.4 Hz, 2H), 7.85 (d, *J* = 8.0 Hz, 2H), 7.74 (d, *J* = 8.0 Hz, 2H), 7.63 (t, *J* = 6.8 and 8.0 Hz, 2H), 7.55 (t, *J* = 7.6 Hz, 2H). <sup>13</sup>C NMR (125 MHz, CDCl<sub>3</sub>) δ: 133.0, 132.4, 132.2, 131.3, 129.1, 129.0, 128.6, 127.3, 126.5, 126.0, 118.8, 116.1, 111.7, 99.0, 91.0. IR (KBr, cm<sup>-1</sup>): 2957, 2918, 2850, 2228, 2195, 1738, 1721, 1674, 1582, 1463, 1283, 1260, 1092, 1027, 802, 758, 691. HR ESI-MS: [C<sub>23</sub>H<sub>13</sub>N]<sup>+</sup> = [M]<sup>+</sup> calculated *m/z* = 303.1048; found *m/z* = 303.1029.

*4-(Anthracen-9-ylethynyl)benzaldehyde (AnPCHO)*

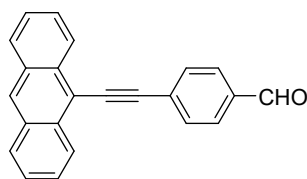

9-Bromoanthracene (0.35 g, 1.36 mmol) and 4-ethynylbenzaldehyde (0.23 g, 1.77 mmol) were Sonogashira-coupled in presence of Pd(PPh<sub>3</sub>)<sub>2</sub>Cl<sub>2</sub> (0.048 g, 0.068 mmol) and CuI (0.013 g, 0.068 mmol) in THF (4 mL) and TEA (2 mL) solvent mixture (2:1, v/v) at 70 °C. Time: 11 h. Yield: 0.312 g, 75%. Yellow Crystalline Solid. Mp: 140-142 °C. TLC: R<sub>f</sub> = 0.23 (4:1, hexane/chloroform). <sup>1</sup>H NMR (400 MHz, CDCl<sub>3</sub>) δ: 10.08 (s, 1H), 8.63 (d, *J* = 8.4 Hz, 2H), 8.50 (s, 1H), 8.05 (d, *J* = 8.4 Hz, 2H), 7.97 (d, *J* = 8.4 Hz, 2H), 7.92 (d, *J* = 8.0 Hz, 2H), 7.64 (t, *J* = 6.8 and 8.0 Hz, 2H), 7.54 (t, *J* = 8.0 and 7.2 Hz, 2H). <sup>13</sup>C NMR (125 MHz, CDCl<sub>3</sub>) δ: 191.6, 135.6, 132.9, 132.2, 131.3, 130.0, 129.9, 129.0, 128.9, 127.2, 126.6, 125.9, 116.4, 100.0, 90.7. IR (KBr, cm<sup>-1</sup>): 3053, 2955, 2922, 2850, 2730, 2192, 1699, 1658, 1598, 1562, 1206, 1164, 886, 835, 737. HR ESI-MS: [C<sub>23</sub>H<sub>14</sub>O]<sup>+</sup> = [M]<sup>+</sup> calculated *m/z* = 306.1045; found *m/z* = 306.1063.

*4-(Anthracen-9-ylethynyl)-N,N-dimethylaniline (AnPNMe<sub>2</sub>)*

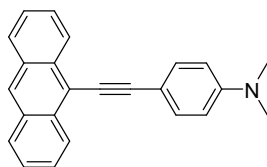

9-Bromoanthracene (0.2 g, 0.78 mmol) and 4-ethynyl-*N,N*-dimethylaniline (0.102 g, 0.702 mmol) were Sonogashira-coupled in presence of Pd(PPh<sub>3</sub>)<sub>2</sub>Cl<sub>2</sub> (0.022 g, 0.031 mmol) and CuI (0.007 g, 0.037 mmol) in DMF (1.5 mL) and TEA (1.5 mL) solvent mixture (1:1, v/v) at 70 °C. Time: 10 h. Yield: 0.175 g, 70%. Yellow Crystalline Solid. Mp: 193-195 °C. TLC: R<sub>f</sub> = 0.34 (4:1, hexane/chloroform). <sup>1</sup>H NMR (400 MHz, CDCl<sub>3</sub>) δ: 8.69 (d, *J* = 8.8 Hz, 2H), 8.38 (s, 1H), 8.01 (d, *J* = 8.4 Hz, 2H), 7.65 (d, *J* = 8.8 Hz, 2H), 7.58 (t, *J* = 6.8 and 8.0 Hz, 2H), 7.50 (t, *J* = 7.6 and 7.2 Hz, 2H), 6.76 (d, *J* = 8.8 Hz, 2H), 3.04 (s, 6H). <sup>13</sup>C NMR (125 MHz, CDCl<sub>3</sub>) δ: 150.6, 133.0, 132.5, 131.5, 128.7, 127.3, 126.7, 126.3, 125.7, 118.7, 112.2, 110.7, 102.5, 84.6, 40.4. IR (KBr, cm<sup>-1</sup>): 3049, 2956, 2918, 2851, 2181, 1656, 1605, 1524, 1461, 1440, 1376,



1360, 1230, 1188, 1064, 1038, 1015, 876, 814, 735. HR ESI-MS:  $[C_{24}H_{19}N]^+ = [M]^+$  calculated  $m/z = 321.1517$ ; found  $m/z = 321.1506$ .

*9-((4-Nitrophenyl)ethynyl)anthracene (AnPNO<sub>2</sub>)*

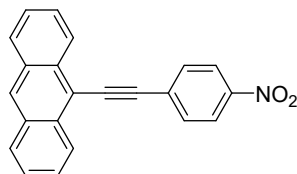

9-Bromoanthracene (0.5 g, 1.9 mmol) and 1-ethynyl-4-nitrobenzene (0.364 g, 2.47 mmol) were Sonogashira-coupled in presence of  $Pd(PPh_3)_2Cl_2$  (0.054 g, 0.076 mmol) and CuI (0.036 g, 0.19 mmol) in THF (8 mL) and TEA (4 mL) solvent mixture (2:1, v/v) at 70 °C. Time: 12 h. Yield: 0.32 g, 51%. Yellow Crystalline Solid. Mp: 208-210 °C. TLC:  $R_f = 0.50$  (4:1, hexane/chloroform).  $^1H$  NMR (400 MHz,  $CDCl_3$ )  $\delta$ : 8.60 (d,  $J = 8.8$  Hz, 2H), 8.52 (s, 1H), 8.32 (d,  $J = 8.8$  Hz, 2H), 8.06 (d,  $J = 8.4$  Hz, 2H), 7.90 (d,  $J = 8.8$  Hz, 2H), 7.67-7.63 (m, 2H), 7.57-7.52 (m, 2H).  $^{13}C$  NMR (125 MHz,  $CDCl_3$ )  $\delta$ : 147.1, 133.0, 132.3, 131.3, 130.6, 129.3, 129.1, 127.3, 126.5, 126.0, 123.9, 115.9, 98.9, 91.9. IR (KBr,  $cm^{-1}$ ): 2959, 2920, 2850, 2197, 1658, 1589, 1512, 1339, 1259, 1101, 1026, 893, 848, 799, 741, 615. HR ESI-MS:  $[C_{22}H_{13}NO_2 + NH_4]^+ = [M + NH_4]^+$  calculated  $m/z = 341.1290$ ; found  $m/z = 341.1281$ .

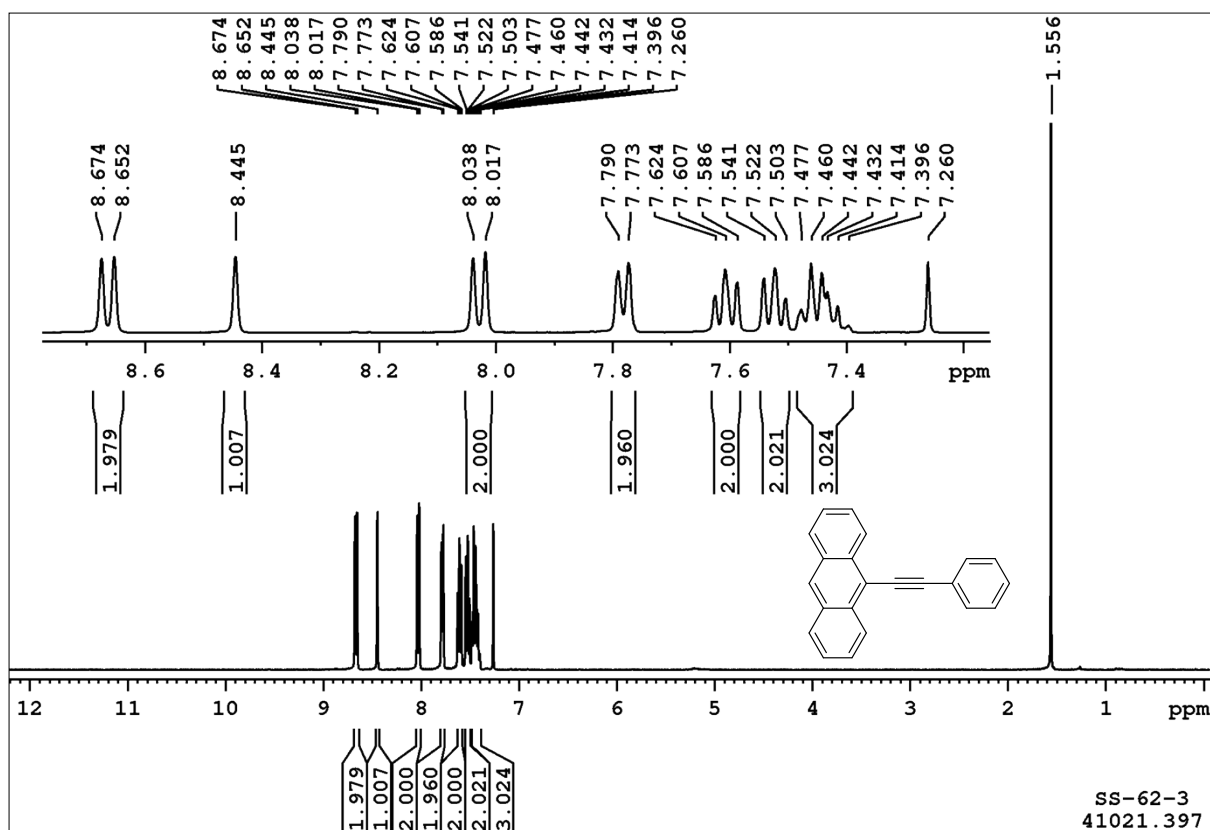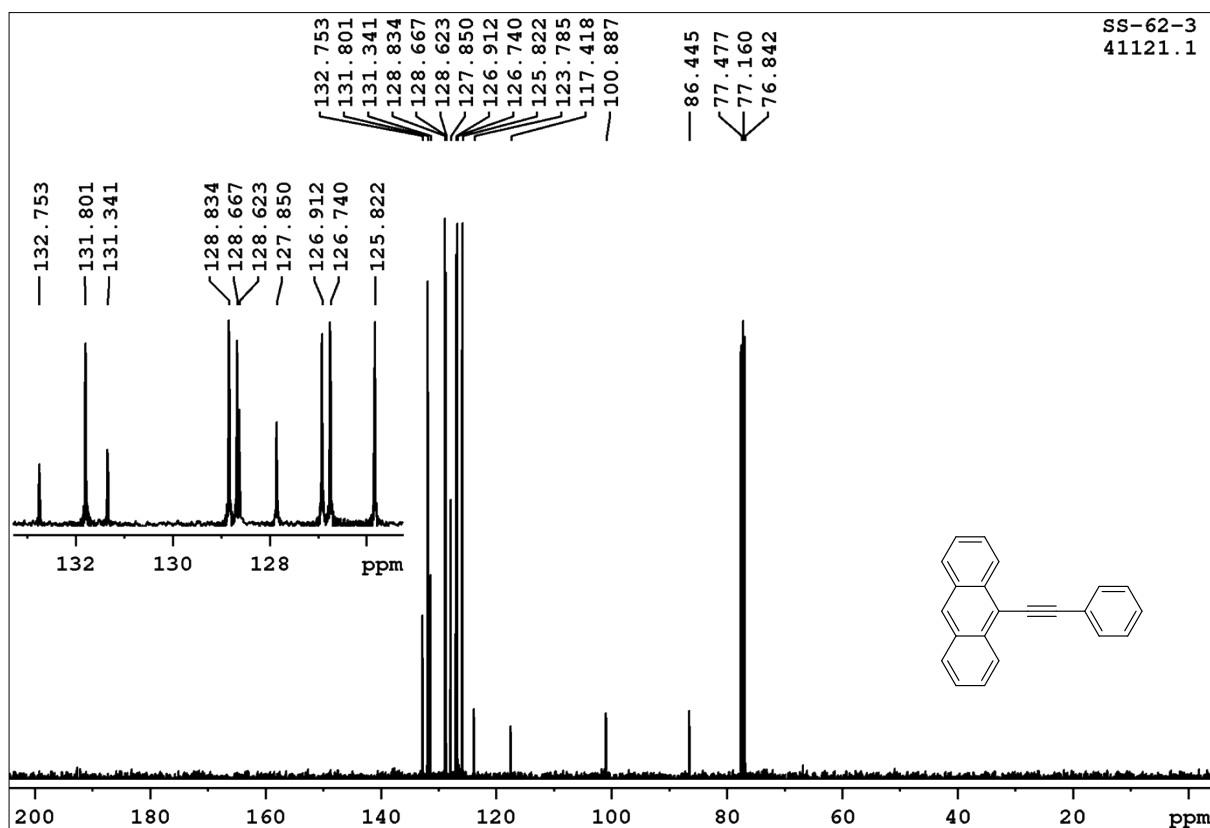

Fig. S1. <sup>1</sup>H NMR (top) and <sup>13</sup>C NMR (bottom) spectra of AnP in CDCl<sub>3</sub>.

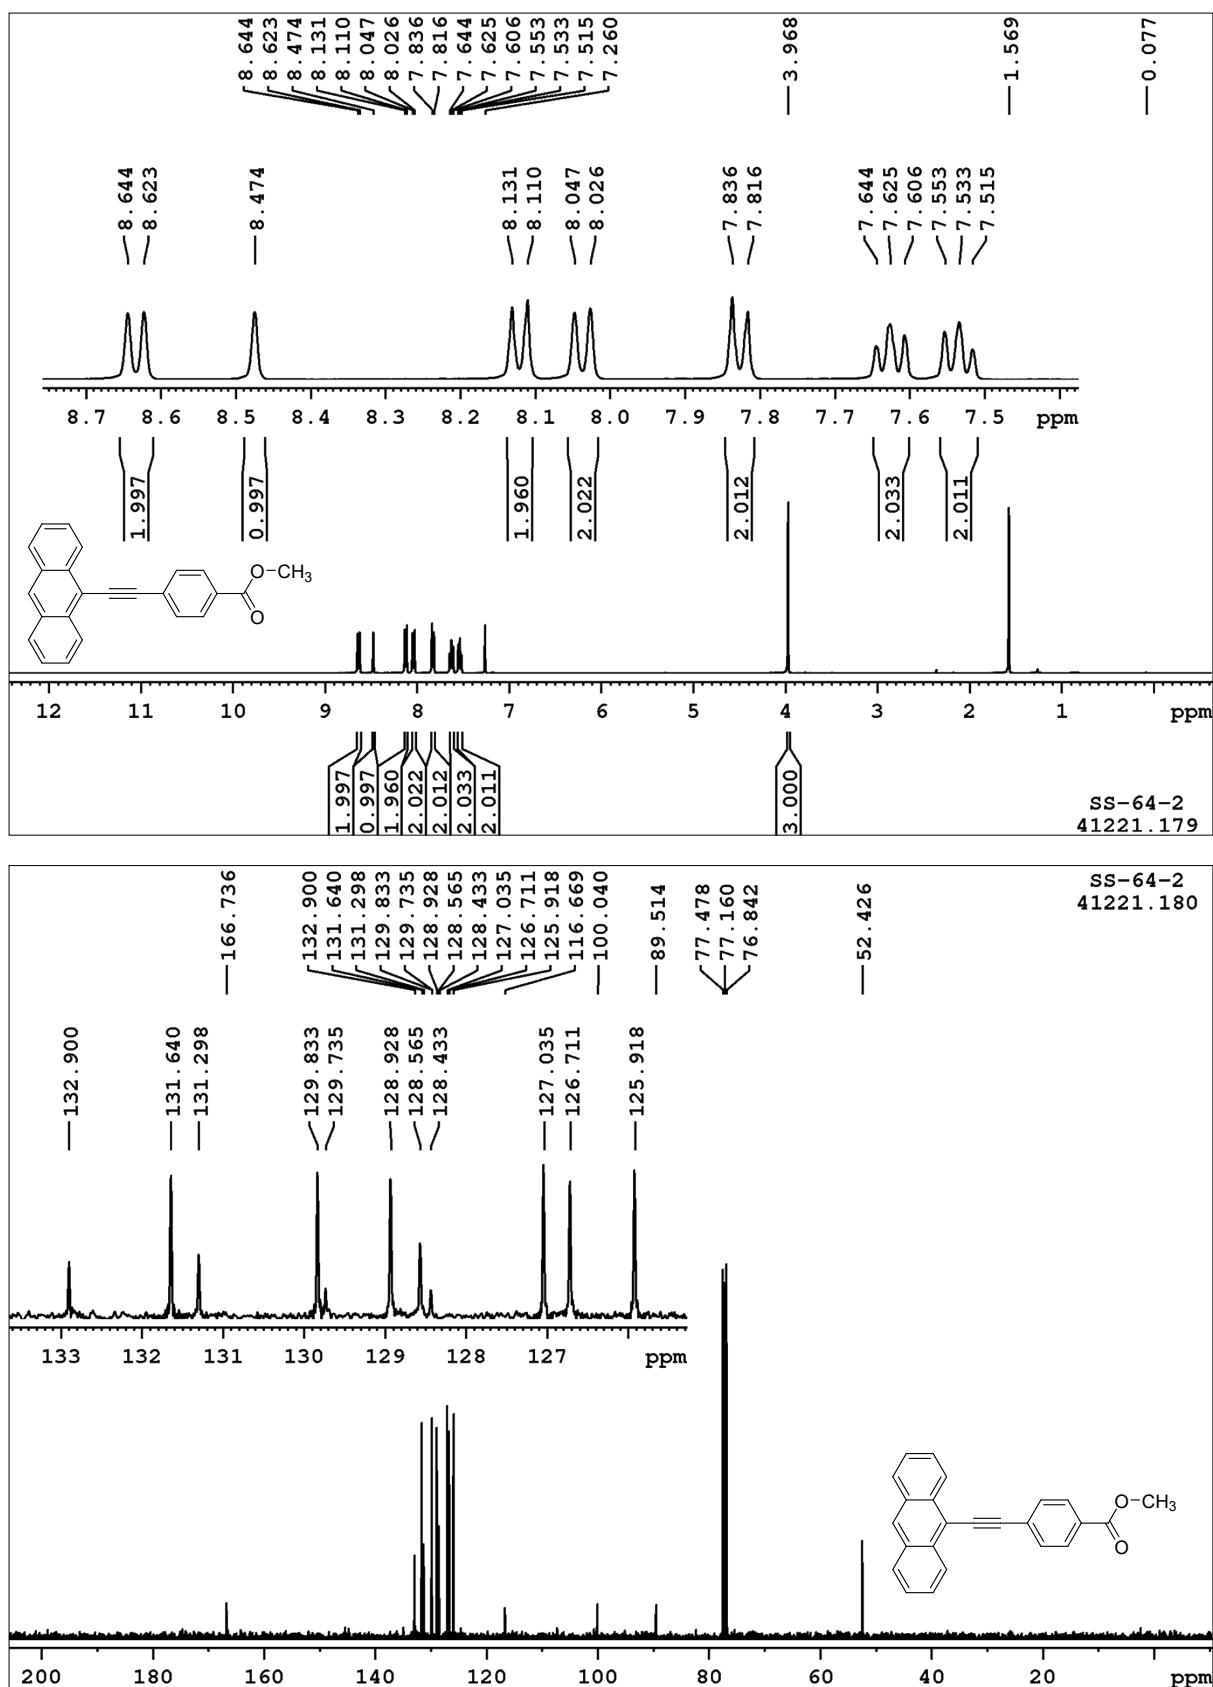

Fig. S2. <sup>1</sup>H NMR (top) and <sup>13</sup>C NMR (bottom) spectra of AnPCO<sub>2</sub>Me in CDCl<sub>3</sub>.

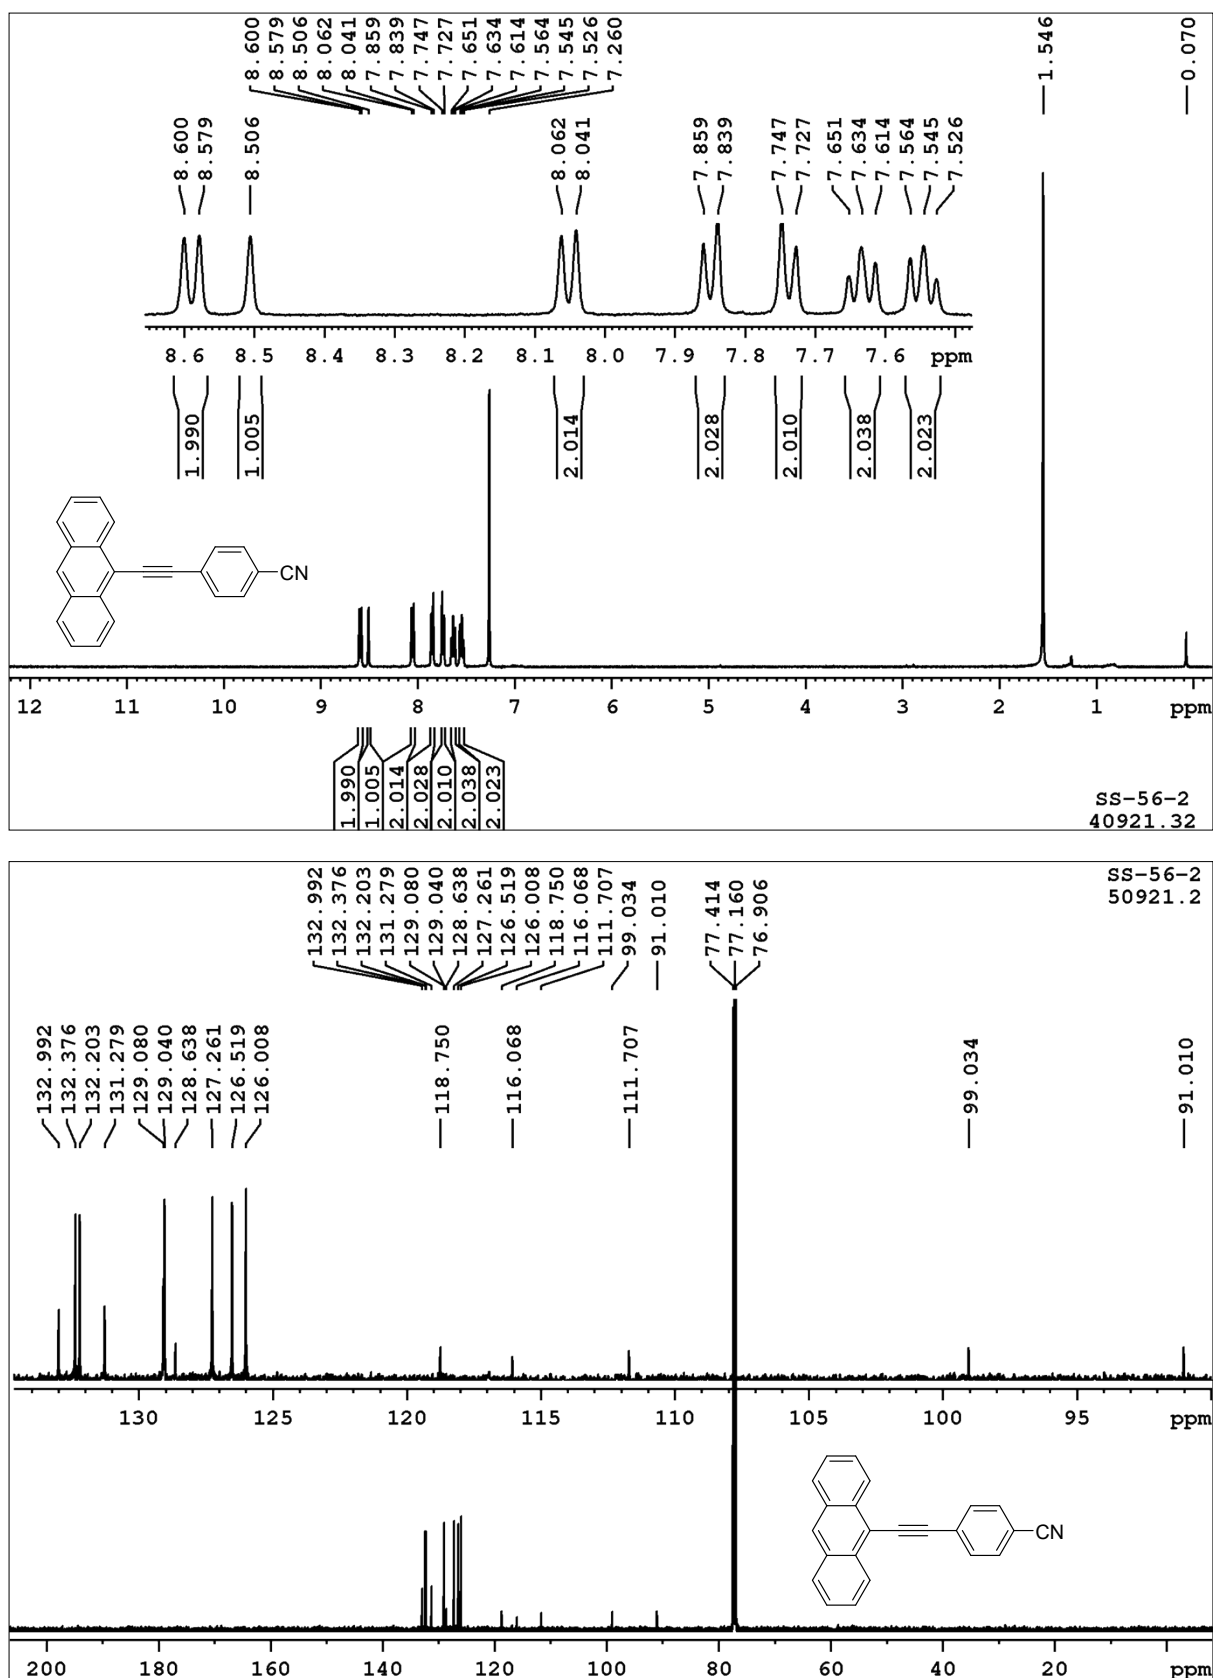

**Fig. S3.** <sup>1</sup>H NMR (top) and <sup>13</sup>C NMR (bottom) spectra of AnPCN in CDCl<sub>3</sub>.

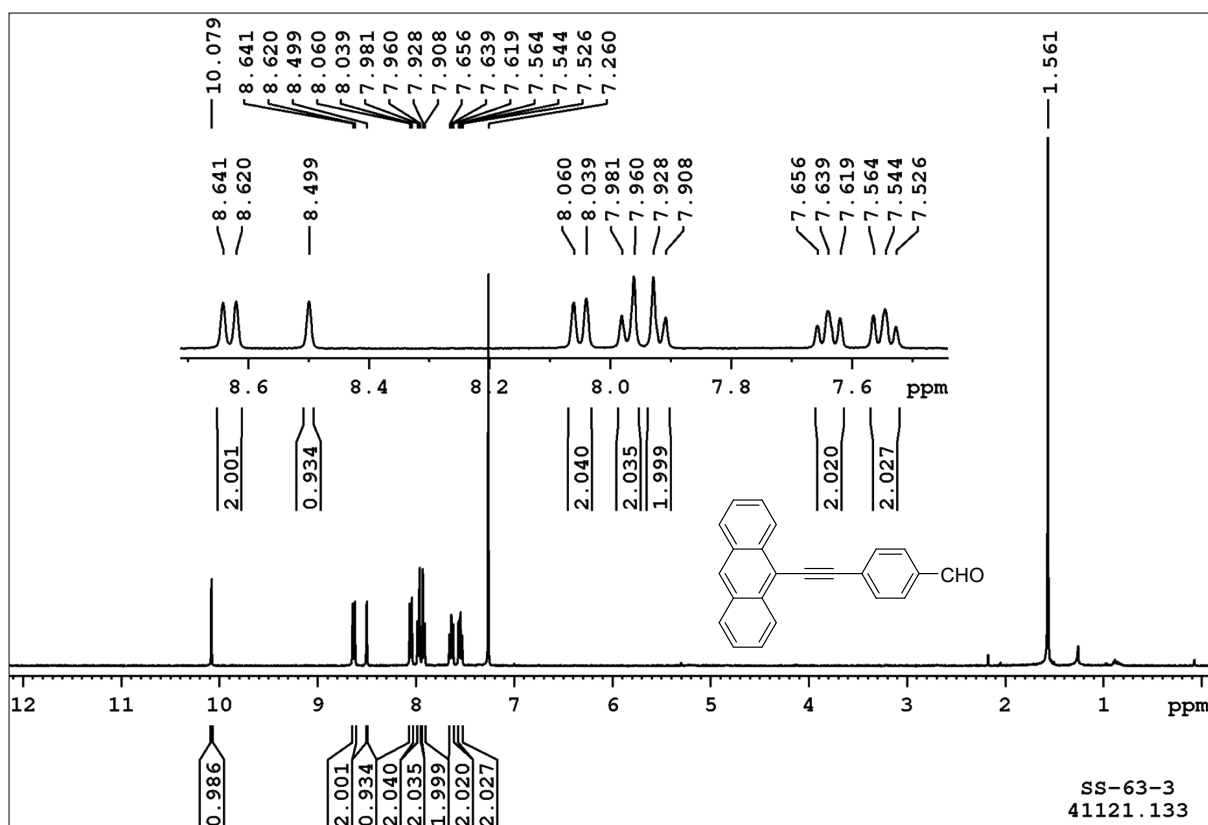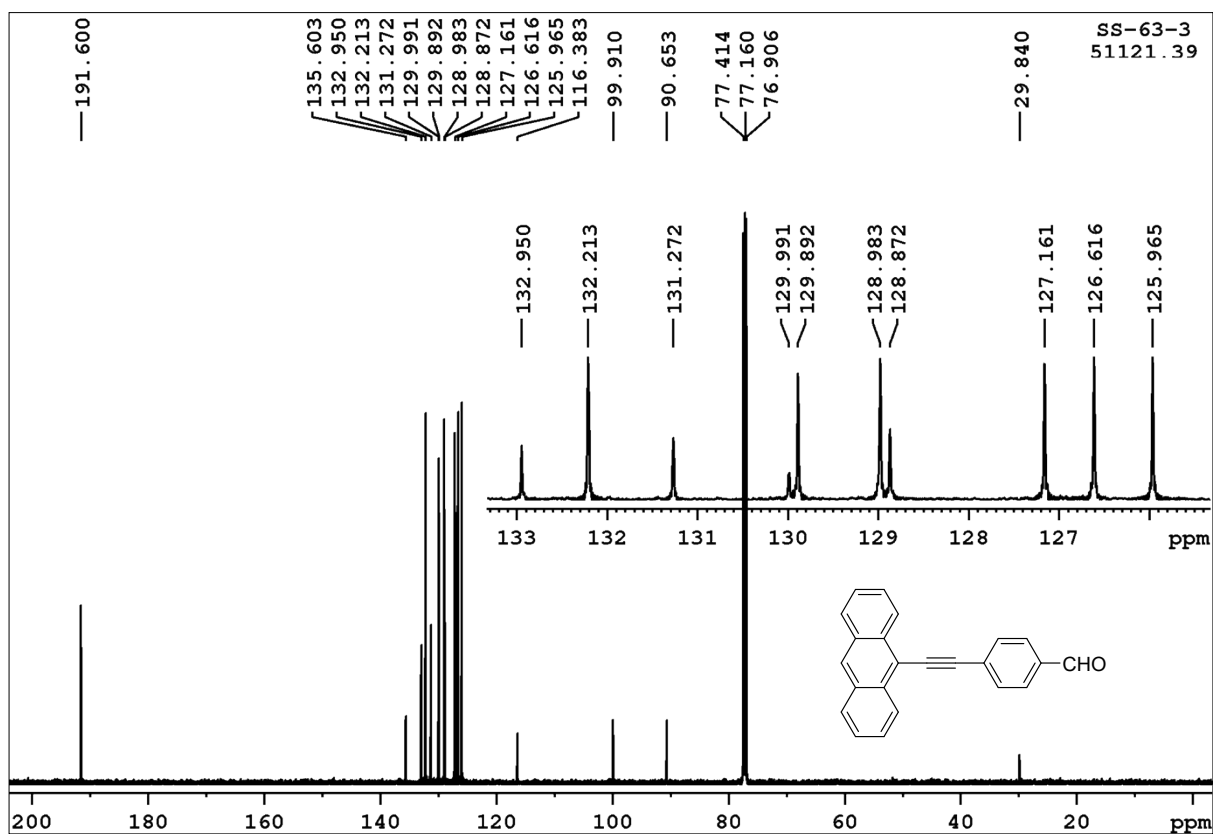

**Fig. S4.** <sup>1</sup>H NMR (top) and <sup>13</sup>C NMR (bottom) spectra of AnPCHO in CDCl<sub>3</sub>.

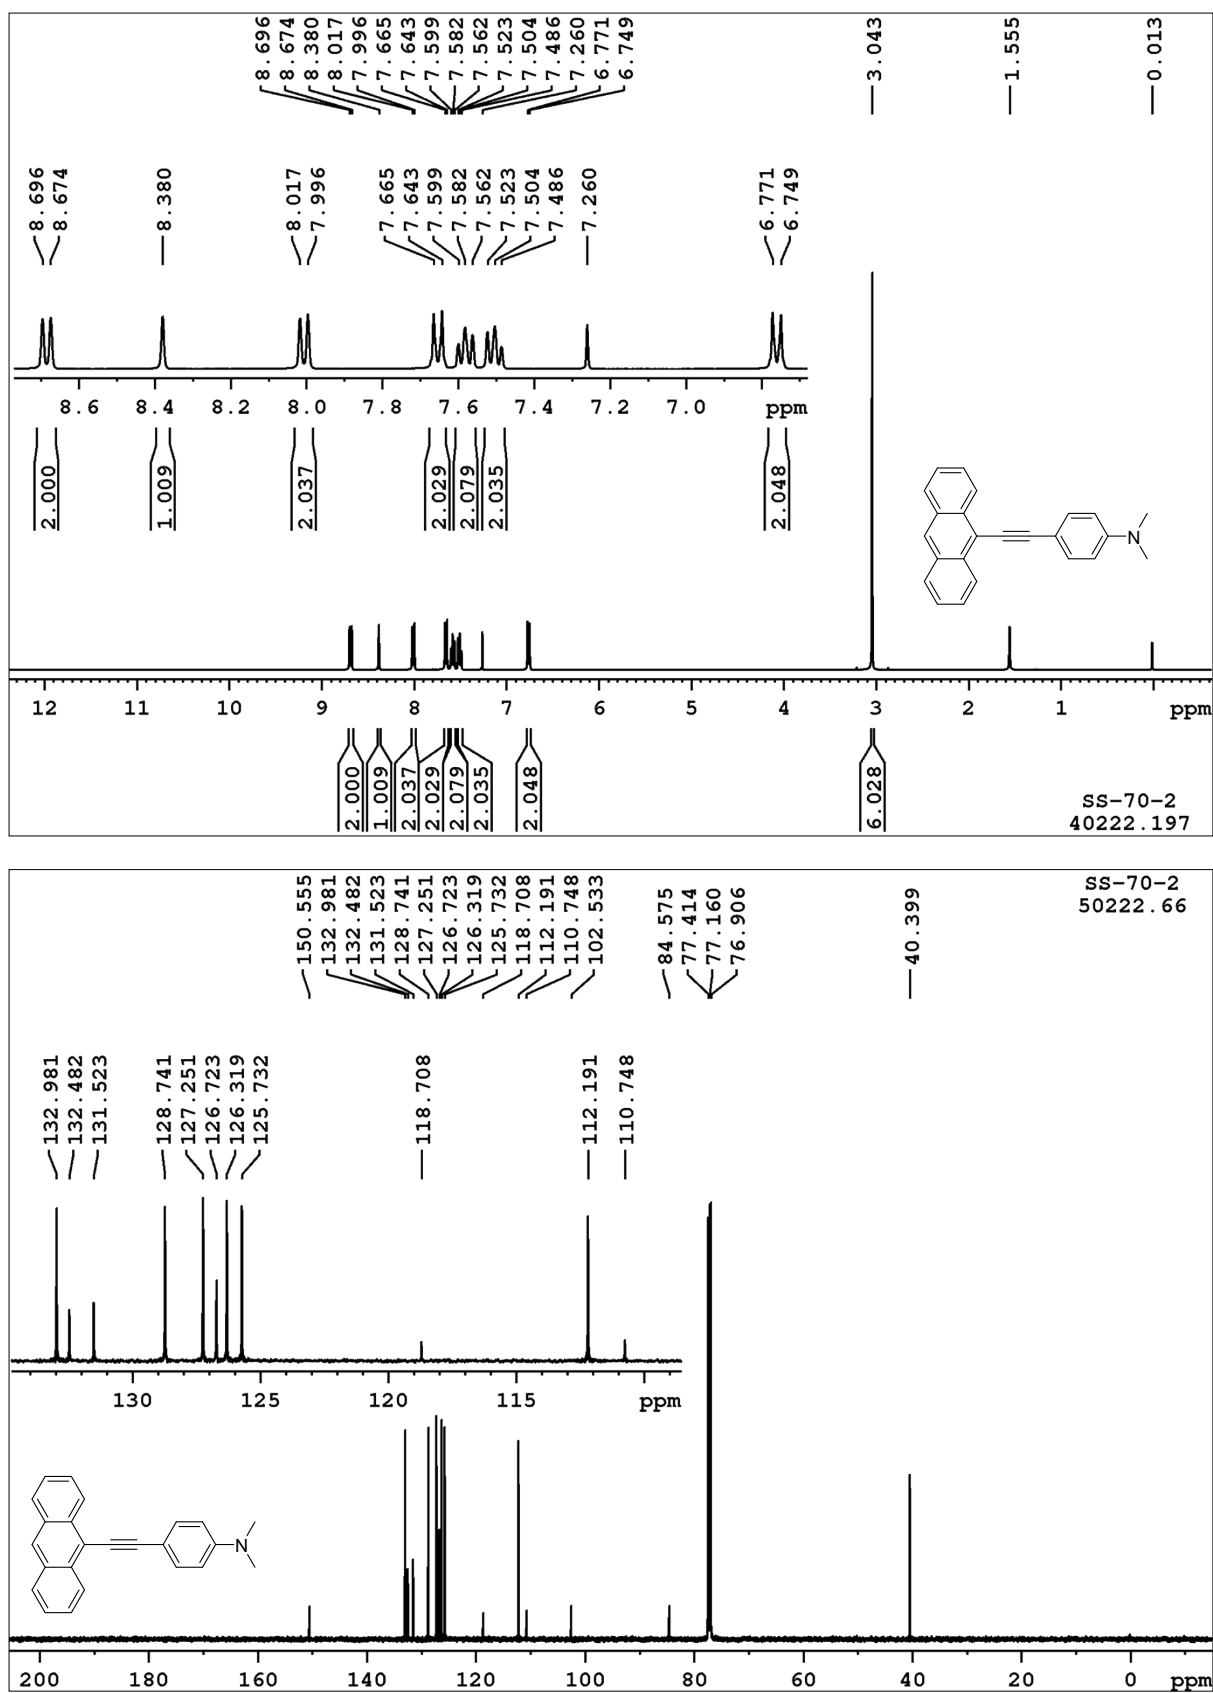

Fig. S5. <sup>1</sup>H NMR (top) and <sup>13</sup>C NMR (bottom) spectra of AnPNMe<sub>2</sub> in CDCl<sub>3</sub>.

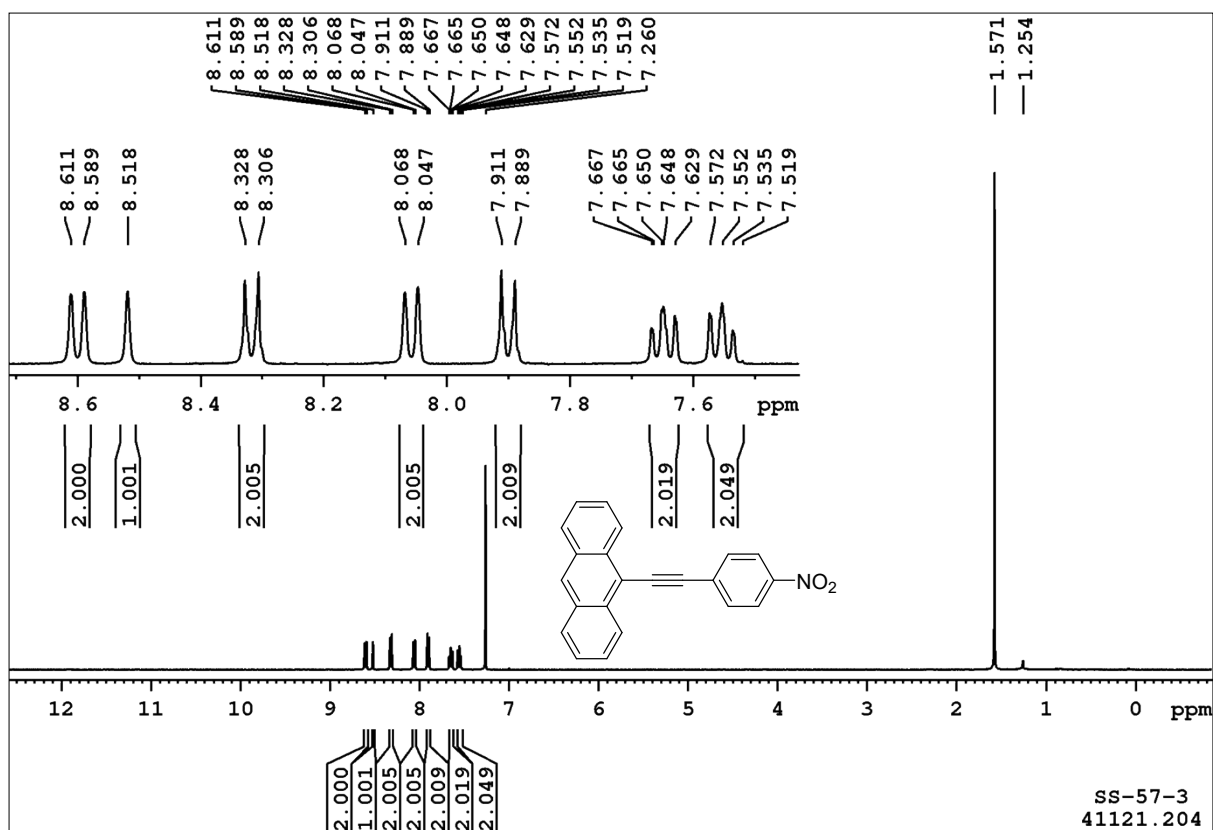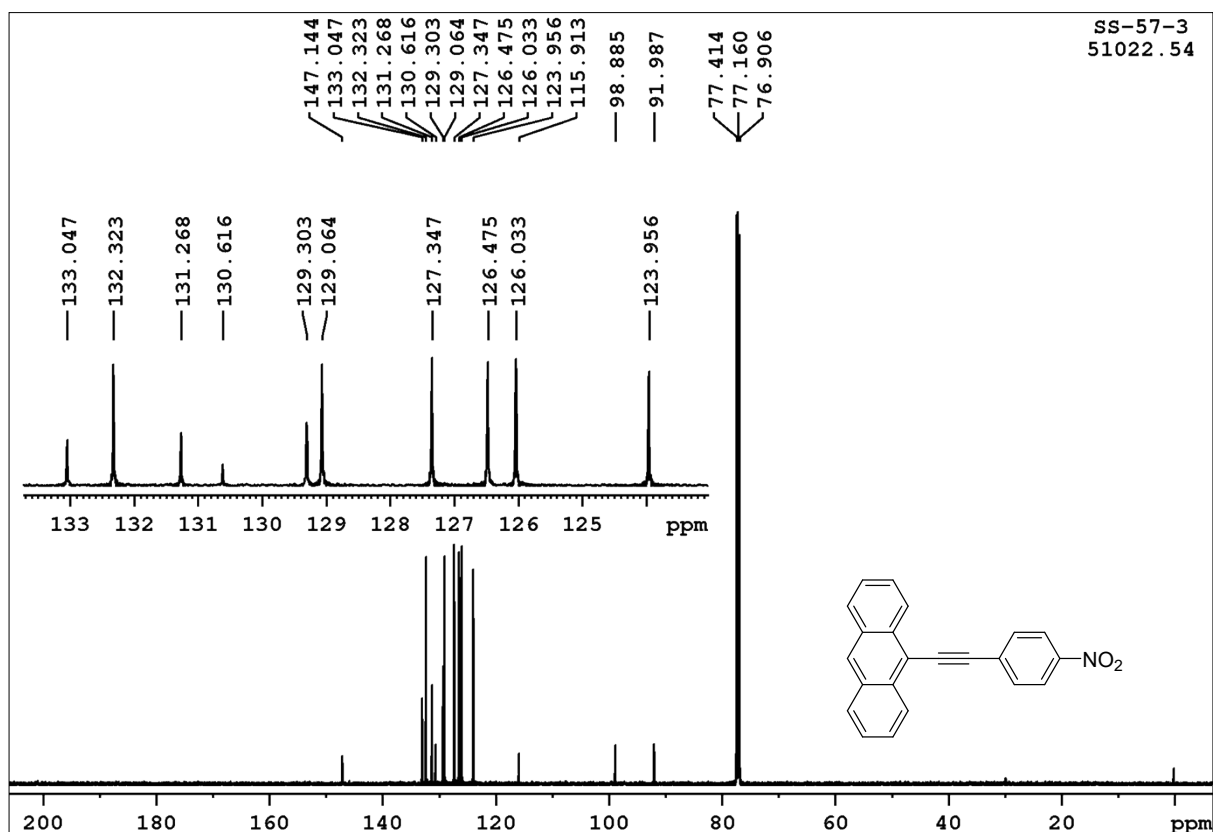

Fig. S6. <sup>1</sup>H NMR (top) and <sup>13</sup>C NMR (bottom) spectrum of AnPNO<sub>2</sub> in CDCl<sub>3</sub>.

**Table S1.** Absorption, emission parameters and Stokes shifts of **AnP**, **AnPCO<sub>2</sub>Me** and **AnPCN** in solvents of varying polarities.

| Solvents    | <b>AnP</b>                     |                               |                                        | <b>AnPCO<sub>2</sub>Me</b>     |                               |                                        | <b>AnPCN</b>                   |                               |                                        |
|-------------|--------------------------------|-------------------------------|----------------------------------------|--------------------------------|-------------------------------|----------------------------------------|--------------------------------|-------------------------------|----------------------------------------|
|             | $\lambda_{\text{abs}}$<br>(nm) | $\lambda_{\text{em}}$<br>(nm) | Stokes<br>shift<br>(cm <sup>-1</sup> ) | $\lambda_{\text{abs}}$<br>(nm) | $\lambda_{\text{em}}$<br>(nm) | Stokes<br>shift<br>(cm <sup>-1</sup> ) | $\lambda_{\text{abs}}$<br>(nm) | $\lambda_{\text{em}}$<br>(nm) | Stokes<br>shift<br>(cm <sup>-1</sup> ) |
| n-Heptane   | 374, 393,<br>415               | 422, 448,<br>473              | 400                                    | 382, 401,<br>423               | 429, 455,<br>483              | 331                                    | 384, 402,<br>426               | 430, 457,<br>484              | 218                                    |
| Cyclohexane | 375, 394,<br>416               | 423, 449,<br>476              | 398                                    | 383, 402,<br>424               | 430, 457,<br>485              | 329                                    | 385, 404,<br>427               | 432, 459,<br>487              | 271                                    |
| 1,4-Dioxane | 377, 397,<br>419               | 428, 454,<br>480              | 502                                    | 385, 405,<br>427               | 437, 463,<br>491              | 536                                    | 387, 406,<br>428               | 440, 465,<br>494(sh)          | 637                                    |
| THF         | 378, 397,<br>419               | 428, 454,<br>480              | 502                                    | 386, 405,<br>427               | 439, 464,<br>494              | 640                                    | 387, 406,<br>428               | 443, 467,<br>494(sh)          | 791                                    |
| DCM         | 380, 398,<br>420               | 429, 456,<br>484              | 500                                    | 385, 405,<br>428               | 440, 465,<br>494              | 637                                    | 387, 407,<br>430               | 444, 468,<br>498(sh)          | 733                                    |
| Methanol    | 375, 393,<br>415               | 425, 450,<br>477              | 567                                    | 383, 401,<br>423               | 439, 460                      | 862                                    | 385, 402,<br>425               | 444, 463                      | 1007                                   |
| Ethanol     | 375, 394,<br>416               | 425, 451,<br>477              | 509                                    | 384, 402,<br>424               | 439, 461                      | 806                                    | 386, 404,<br>426               | 443, 465                      | 901                                    |
| 2-Propanol  | 375, 394,<br>415               | 425, 451,<br>477              | 567                                    | 384, 402,<br>424               | 439, 461                      | 806                                    | 386, 404,<br>426               | 443, 466                      | 901                                    |
| MeCN        | 375, 395,<br>417               | 427, 453,<br>479              | 562                                    | 384, 402,<br>424               | 440, 461                      | 858                                    | 387, 403,<br>426               | 445, 464                      | 1002                                   |
| DMF         | 380, 399,<br>421               | 431, 458,<br>485              | 551                                    | 386, 406,<br>429               | 446, 468                      | 888                                    | 387, 408,<br>430               | 451, 470                      | 1083                                   |

**Table S2.** Absorption, emission parameters and Stokes shifts of **AnPCHO**, **AnPNMe<sub>2</sub>** and **AnPNO<sub>2</sub>** in solvents of varying polarities.

| Solvents    | <b>AnPCHO</b>                  |                               |                                        | <b>AnPNMe<sub>2</sub></b>      |                               |                                        | <b>AnPNO<sub>2</sub></b>       |                               |                                        |
|-------------|--------------------------------|-------------------------------|----------------------------------------|--------------------------------|-------------------------------|----------------------------------------|--------------------------------|-------------------------------|----------------------------------------|
|             | $\lambda_{\text{abs}}$<br>(nm) | $\lambda_{\text{em}}$<br>(nm) | Stokes<br>shift<br>(cm <sup>-1</sup> ) | $\lambda_{\text{abs}}$<br>(nm) | $\lambda_{\text{em}}$<br>(nm) | Stokes<br>shift<br>(cm <sup>-1</sup> ) | $\lambda_{\text{abs}}$<br>(nm) | $\lambda_{\text{em}}$<br>(nm) | Stokes<br>shift<br>(cm <sup>-1</sup> ) |
| n-Heptane   | 385, 405,<br>429               | 434, 461,<br>491              | 269                                    | 385, 411,<br>436               | 450, 477,<br>508              | 714                                    | 394, 414,<br>439               | 446, 474,<br>503              | 358                                    |
| Cyclohexane | 386, 407,<br>430               | 436, 463,<br>492              | 320                                    | 386, 413,<br>437               | 452, 479,<br>510              | 759                                    | 397, 416,<br>442               | 449, 477,<br>506              | 353                                    |
| 1,4-Dioxane | 388, 408,<br>431               | 447, 471                      | 830                                    | 390, 418,<br>439               | 493                           | 2495                                   | 390, 417,<br>438               | 520                           | 3600                                   |
| THF         | 388, 409,<br>432               | 471                           | 1917                                   | 391, 419,<br>439               | 530                           | 3911                                   | 390, 417,<br>437               | 551                           | 4734                                   |
| DCM         | 390, 410,<br>434               | 479                           | 2165                                   | 392, 420,<br>440               | 524                           | 3643                                   | 392, 420,<br>438               | 617                           | 6624                                   |
| Methanol    | 385, 405,<br>425               | 425, 450,<br>478              | 0                                      | 385, 413,<br>431               | 548                           | 4954                                   | 388, 412,<br>432               | 522                           | 3991                                   |
| Ethanol     | 387, 406,<br>428               | 425, 451,<br>478              | -                                      | 387, 416,<br>434               | 535                           | 4350                                   | 388, 414,<br>434               | 516                           | 3662                                   |
| 2-Propanol  | 386, 407,<br>429               | 426, 453,<br>520              | 4079                                   | 388, 416,<br>432               | 527                           | 4173                                   | 387, 414,<br>434               | 506                           | 3279                                   |
| MeCN        | 387, 406,<br>428               | 499                           | 3324                                   | 387, 416,<br>435               | 569                           | 5414                                   | 388, 413,<br>432               | 639                           | 7499                                   |
| DMF         | 390, 410,<br>433               | 495                           | 2893                                   | 393, 421,<br>441               | 574                           | 5254                                   | 392, 418,<br>437               | 628                           | 6960                                   |



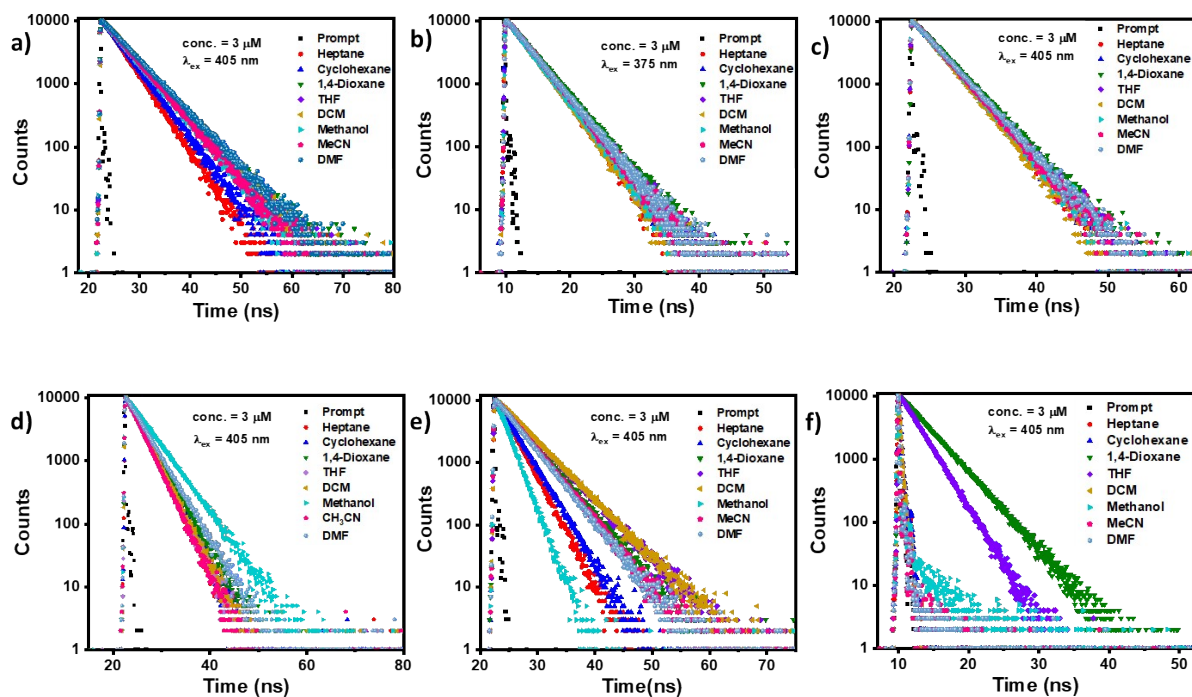

**Fig. S7.** Fluorescence decay profiles of (a) AnP, (b) AnPCO<sub>2</sub>Me ( $\lambda_{\text{ex}} = 375$  nm), (c) AnPCN, (d) AnPCHO, (e) AnPNMe<sub>2</sub> and (f) AnPNO<sub>2</sub> ( $\lambda_{\text{ex}} = 405$  nm) ( $3 \times 10^{-6}$  M) in solvents of different polarities.

**Table S3.** Fluorescence decay data of AnP, AnPCO<sub>2</sub>Me and AnPCN in solvents of varying polarities. ( $\beta$  is the contribution of each emitting species towards the total emission and  $\alpha$  is the population of the emitting species.)

| Solvents    | AnP ( $\lambda_{\text{ex}} = 405$ nm) |                                  |          | AnPCO <sub>2</sub> Me ( $\lambda_{\text{ex}} = 375$ nm) |                                  |          | AnPCN ( $\lambda_{\text{ex}} = 405$ nm) |                                  |          |
|-------------|---------------------------------------|----------------------------------|----------|---------------------------------------------------------|----------------------------------|----------|-----------------------------------------|----------------------------------|----------|
|             | $\lambda_{\text{em}}$                 | $\tau(\text{ns})(\beta)(\alpha)$ | $\chi^2$ | $\lambda_{\text{em}}$                                   | $\tau(\text{ns})(\beta)(\alpha)$ | $\chi^2$ | $\lambda_{\text{em}}$                   | $\tau(\text{ns})(\beta)(\alpha)$ | $\chi^2$ |
| Heptane     | 422                                   | 3.58(100)(100)                   | 1.17     | 429                                                     | 3.16(100)(100)                   | 1.13     | 430                                     | 3.24(100)(100)                   | 1.08     |
| Cyclohexane | 423                                   | 4.00(100)(100)                   | 1.05     | 430                                                     | 3.29(100)(100)                   | 1.12     | 432                                     | 3.32(100)(100)                   | 1.15     |
| 1,4-Dioxane | 428                                   | 4.91(100)(100)                   | 1.10     | 437                                                     | 3.58(100)(100)                   | 1.14     | 440                                     | 3.59(100)(100)                   | 1.26     |
| THF         | 427                                   | 4.70(100)(100)                   | 1.17     | 439                                                     | 3.35(100)(100)                   | 1.20     | 443                                     | 3.40(100)(100)                   | 1.16     |
| DCM         | 430                                   | 4.93(100)(100)                   | 1.12     | 440                                                     | 3.12(100)(100)                   | 1.15     | 444                                     | 3.13(100)(100)                   | 1.12     |
| Methanol    | 425                                   | 4.56(100)(100)                   | 1.15     | 439                                                     | 3.25(100)(100)                   | 1.04     | 444                                     | 3.32(100)(100)                   | 1.00     |
| MeCN        | 427                                   | 4.64(100)(100)                   | 1.03     | 440                                                     | 3.36(100)(100)                   | 1.12     | 445                                     | 3.34(100)(100)                   | 1.00     |
| DMF         | 431                                   | 5.08(100)(100)                   | 1.13     | 446                                                     | 3.42(100)(100)                   | 1.19     | 452                                     | 3.49(100)(100)                   | 1.17     |

**Table S4.** Fluorescence decay data of **AnPCHO**, **AnPNMe<sub>2</sub>** and **AnPNO<sub>2</sub>** in solvents of varying polarities.

| Solvents    | <b>AnPCHO</b> ( $\lambda_{ex} = 405$ nm) |                           |          | <b>AnPNMe<sub>2</sub></b> ( $\lambda_{ex} = 405$ nm) |                           |          | <b>AnPNO<sub>2</sub></b> ( $\lambda_{ex} = 405$ nm) |                           |          |
|-------------|------------------------------------------|---------------------------|----------|------------------------------------------------------|---------------------------|----------|-----------------------------------------------------|---------------------------|----------|
|             | $\lambda_{em}$                           | $\tau(ns)(\beta)(\alpha)$ | $\chi^2$ | $\lambda_{em}$                                       | $\tau(ns)(\beta)(\alpha)$ | $\chi^2$ | $\lambda_{em}$                                      | $\tau(ns)(\beta)(\alpha)$ | $\chi^2$ |
| Heptane     | 434                                      | 2.71(100)(100)            | 1.20     | 451                                                  | 2.49(100)(100)            | 1.18     | 446                                                 | 0.1(100)(100)             | 1.29     |
| Cyclohexane | 436                                      | 2.81(100)(100)            | 1.20     | 452                                                  | 2.84(100)(100)            | 1.06     | 449                                                 | 0.2(100)(100)             | 1.27     |
| 1,4-Dioxane | 447                                      | 3.08(100)(100)            | 1.20     | 499                                                  | 4.01(100)(100)            | 1.09     | 520                                                 | 3.78(100)(100)            | 1.10     |
| THF         | 471                                      | 2.71(100)(100)            | 1.23     | 530                                                  | 3.98(100)(100)            | 1.12     | 551                                                 | 2.37(100)(100)            | 1.22     |
| DCM         | 479                                      | 2.77(100)(100)            | 1.20     | 524                                                  | 4.62(100)(100)            | 1.02     | 617                                                 | -                         | -        |
| Methanol    | 424                                      | 4.08(100)(100)            | 1.20     | 548                                                  | 1.79(100)(100)            | 1.19     | 522                                                 | -                         | -        |
| MeCN        | 499                                      | 2.63(100)(100)            | 1.17     | 569                                                  | 3.86(100)(100)            | 1.01     | 639                                                 | -                         | -        |
| DMF         | 495                                      | 3.32(100)(100)            | 1.20     | 575                                                  | 3.75(100)(100)            | 1.00     | 628                                                 | -                         | -        |

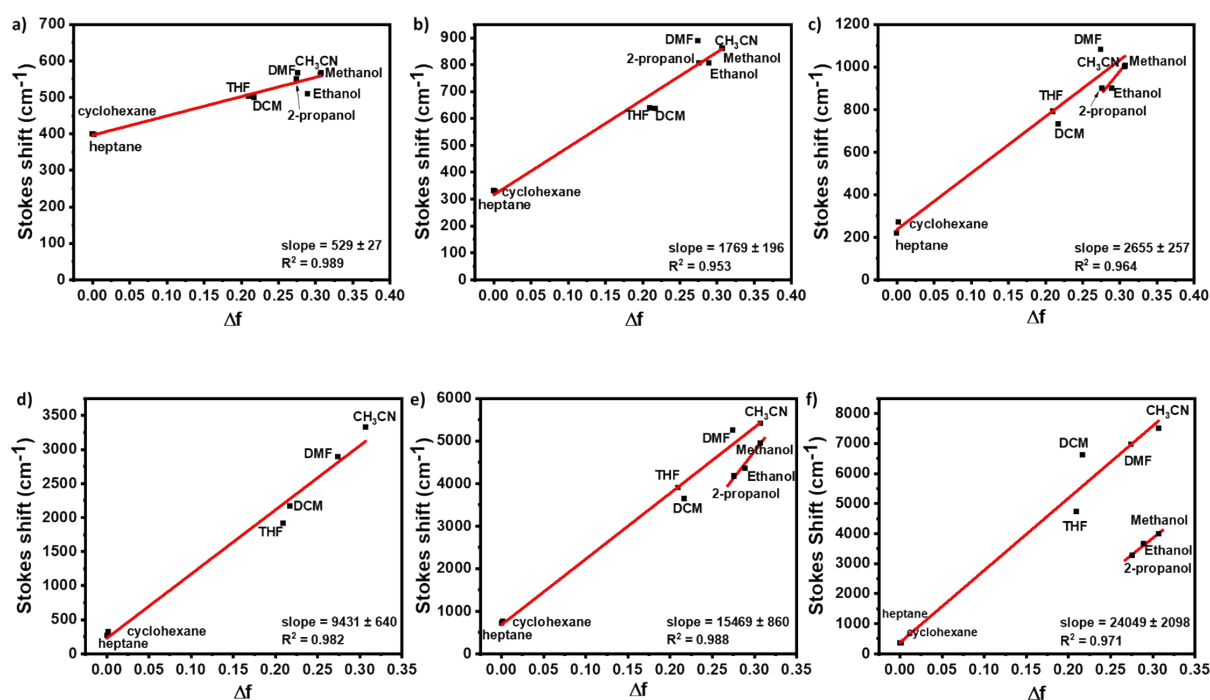

**Fig. S8.** Lippert-Mataga plots for (a) **AnP**, (b) **AnPCO<sub>2</sub>Me**, (c) **AnPCN**, (d) **AnPCHO**, (e) **AnPNMe<sub>2</sub>** and (f) **AnPNO<sub>2</sub>**.

**Table S5.**  $t$ -indices,  $q_{CT}$ ,  $d_{CT}$  and ICT operative change in dipole moment ( $\mu_e - \mu_g$ ) of the compounds calculated from electron density difference plots.

| Compound        | AnP    | AnPCO <sub>2</sub> Me | AnPCN  | AnPCHO | AnPNMe <sub>2</sub> | AnPNO <sub>2</sub> |
|-----------------|--------|-----------------------|--------|--------|---------------------|--------------------|
| $t$ -index (Å)  | -1.933 | -0.555                | -0.163 | 0.766  | 0.975               | 1.962              |
| $q_{CT}$ (a.u.) | 0.301  | 0.423                 | 0.441  | 0.547  | 0.615               | 0.815              |
| $d_{CT}$ (Å°)   | 0.480  | 2.811                 | 3.112  | 4.226  | 4.498               | 5.558              |
| $\Delta\mu$ (D) | 0.72   | 5.90                  | 6.64   | 11.09  | 13.28               | 21.76              |

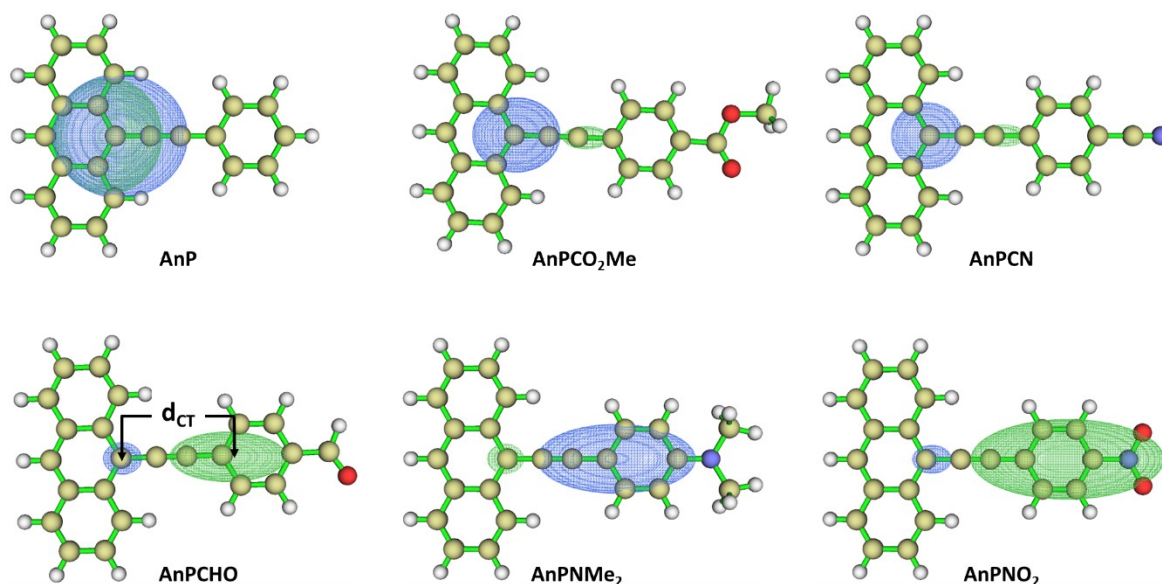

**Fig. S9.** Plots of positive and negative parts of  $\Delta\rho(r)$ . Green and blue regions indicate the positive ( $\rho^+$ ) and negative ( $\rho^-$ ) parts of  $\Delta\rho$  respectively. Different iso-surface values are adjusted so as just to visualize both the regions.

**Table S6.** Calculated transition dipole moment vectors of the compounds (arrows show their directions and magnitudes are in red fonts) for  $S_0 \rightarrow S_1$  (absorption),  $S_1 \rightarrow S_0$  (emission) and  $S_0 \rightarrow S_2$  (absorption) in cyclohexane using CAM-B3LYP/6-311+g(d,p) level of theory.

| Compound              | Directions of Transition Dipole Moment Vectors and their Magnitudes in debye               |                                                                                             |                                                                                              |
|-----------------------|--------------------------------------------------------------------------------------------|---------------------------------------------------------------------------------------------|----------------------------------------------------------------------------------------------|
|                       | $S_0 \rightarrow S_1$                                                                      | $S_1 \rightarrow S_0$                                                                       | $S_0 \rightarrow S_2$                                                                        |
| AnP                   | 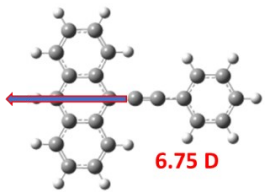 6.75 D   |  7.28 D   |  0.50 D   |
| AnPCO <sub>2</sub> Me |  7.77 D   |  8.46 D   |  0.80 D   |
| AnPCN                 |  7.86 D |  8.52 D |  0.98 D |
| AnPCHO                |  8.12 D |  8.82 D |  0.93 D |
| AnPNMe <sub>2</sub>   |  8.03 D |  8.57 D |  0.06 D |
| AnPNO <sub>2</sub>    |  8.50 D |  9.43 D |  2.74 D |

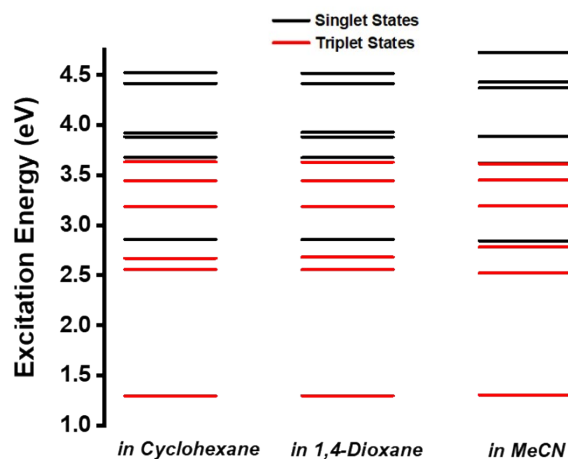

**Fig. S10.** Vertical excitation energies for singlet (black lines) and triplet (red lines) states of AnPNO<sub>2</sub> in cyclohexane, 1,4-dioxane and MeCN using CAM-B3LYP/6-311+g(d,p).

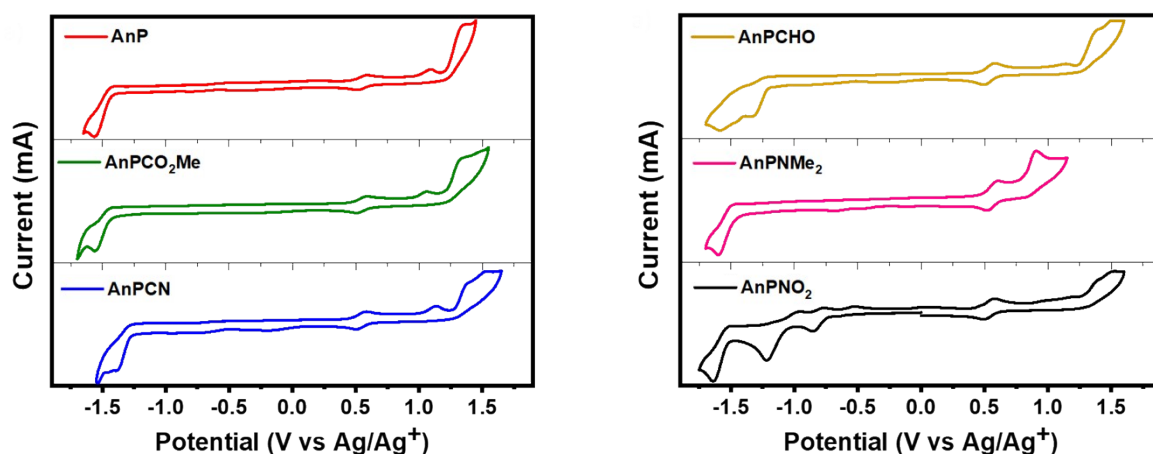

**Fig. S11.** Cyclic voltammograms of the compounds with Fc/Fc<sup>+</sup> in MeCN.

**Table S7.** Electrochemical properties of the compounds recorded in MeCN.

| Compound              | $E_{\text{onset}}(\text{ox})$ (V) | $E_{\text{onset}}(\text{red})$ (V) | $E_{\text{HOMO}}^{\text{a}}$ (eV) | $E_{\text{LUMO}}^{\text{b}}$ (eV) | $E_{\text{g}}^{\text{CV c}}/E_{\text{g}}^{\text{opt d}}$ (eV) |
|-----------------------|-----------------------------------|------------------------------------|-----------------------------------|-----------------------------------|---------------------------------------------------------------|
| AnP                   | +0.97                             | -1.42                              | -5.31                             | -2.76                             | 2.55/2.88                                                     |
| AnPCO <sub>2</sub> Me | +0.96                             | -1.44                              | -5.30                             | -2.74                             | 2.56/2.81                                                     |
| AnPCN                 | +1.02                             | -1.29                              | -5.36                             | -2.90                             | 2.46/2.79                                                     |
| AnPCHO                | +0.90                             | -1.22                              | -5.24                             | -2.97                             | 2.27/2.76                                                     |
| AnPNMe <sub>2</sub>   | +0.80                             | -1.47                              | -5.12                             | -2.71                             | 2.41/2.64                                                     |
| AnPNO <sub>2</sub>    | +0.89                             | -0.75                              | -5.23                             | -3.45                             | 1.78/2.58                                                     |

The first oxidation and reduction of the cyclic voltammograms were considered for the calculations.  $E_{\text{g}}$  is the energy gap between HOMO and LUMO and  $\lambda_{\text{onset}}$  is the onset of the UV-visible absorption spectra (here taken in MeCN).

$$^{\text{a}}E_{\text{HOMO}} = -[E_{\text{onset}}(\text{oxidation}) + 4.8 - E_{\text{FC}}] \text{ eV}; \quad ^{\text{b}}E_{\text{LUMO}} = -[E_{\text{onset}}(\text{reduction}) + 4.8 - E_{\text{FC}}] \text{ eV}; \quad ^{\text{c}}E_{\text{g}}^{\text{CV}} = E_{\text{LUMO}} - E_{\text{HOMO}}; \quad ^{\text{d}}E_{\text{g}}^{\text{opt}} = (1240/\lambda_{\text{onset}}) \text{ eV}$$

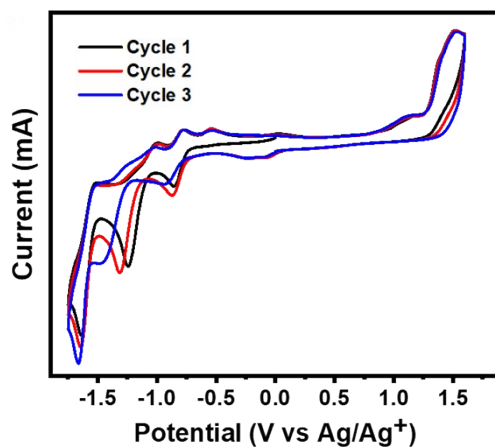

**Fig. S12.** Cyclic voltammogram of  $\text{AnPNO}_2$  for three consecutive cycles in MeCN showing its electrochemical instability.

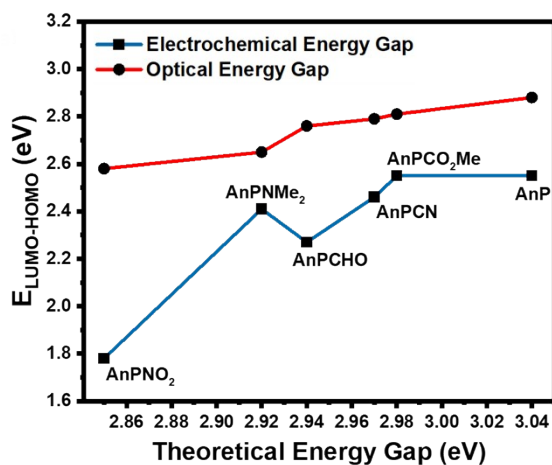

**Fig. S13.** Comparison of optical and electrochemical energy gap (HOMO-LUMO gap) with respect to the theoretical ones.

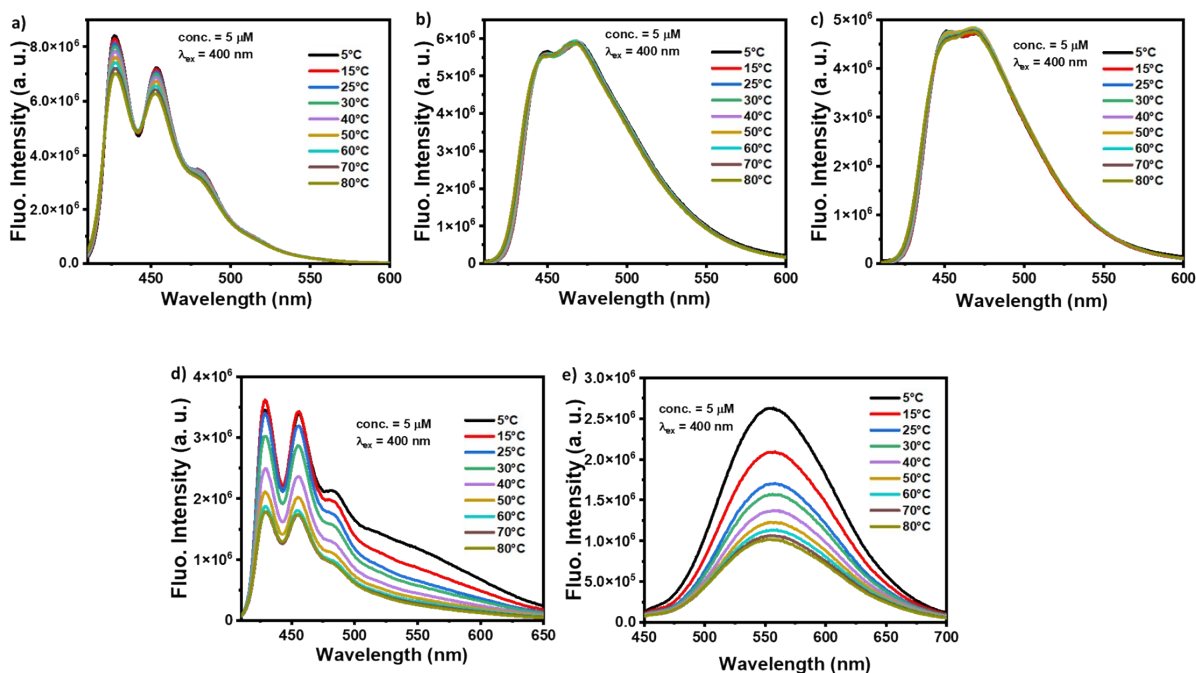

**Fig. S14.** Temperature-dependence of emission spectra of (a) AnP, (b) AnPCO<sub>2</sub>Me, (c) AnPCN, (d) AnPCHO and (e) AnPNMe<sub>2</sub> ( $\lambda_{\text{ex}} = 400 \text{ nm}$ ) ( $5 \mu\text{M}$ ) in Propylene glycol.

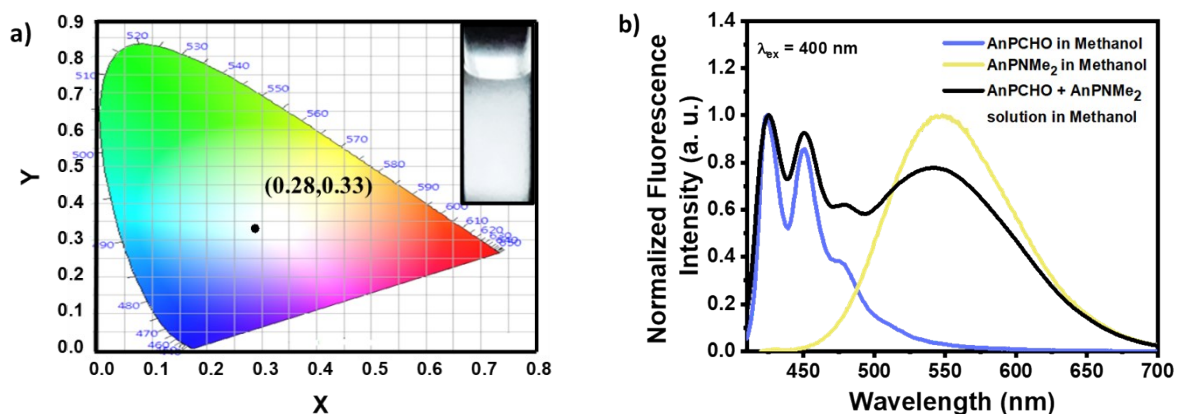

**Fig. S15.** (a) CIE chromaticity diagram of the WLE solution obtained by mixing methanol solutions of AnPCHO ( $5 \mu\text{M}$ ) and AnPNMe<sub>2</sub> ( $5 \mu\text{M}$ ) in 2:3 ratio (v/v) (inset: luminescence image of the solution under excitation of 400 nm) and (b) normalized emission spectra of AnPCHO, AnPNMe<sub>2</sub> and the WLE solution in methanol ( $\lambda_{\text{ex}} = 400 \text{ nm}$ ).



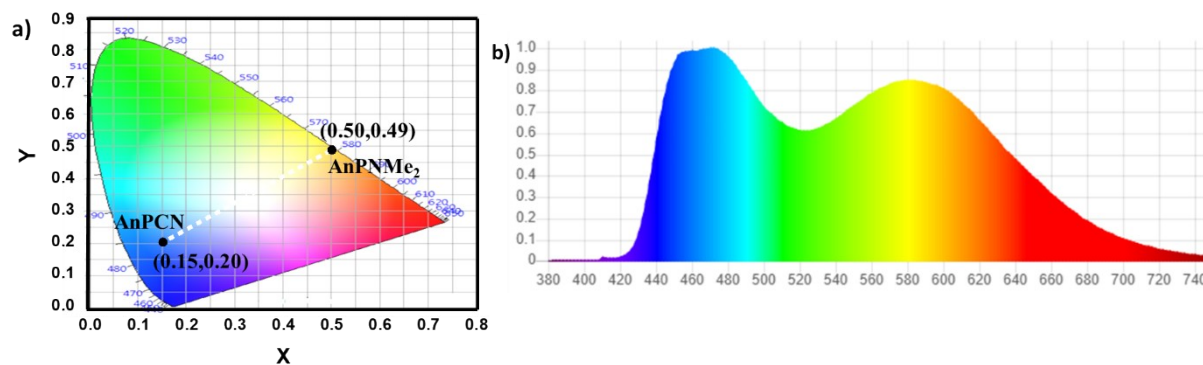

**Fig. S16.** (a) CIE chromaticity diagram of **AnPCN** and **AnPNMe<sub>2</sub>** in DMSO and the connecting line represents the CIE indices of their solutions mixed in different proportions and (b) normalized color spectrum of the emission from the resulting WLE solution by mixing DMSO solutions of **AnPCN** (5  $\mu$ M) and **AnPNMe<sub>2</sub>** (5  $\mu$ M) in 3:22 ratio (v/v).

**Table S8.** Fluorescence lifetime values of **AnPCN** and **AnPNMe<sub>2</sub>** solution in DMSO, WLE solution in DMSO and the WLE gel ( $\lambda_{\text{ex}} = 405$  nm).

|                                   | $\lambda_{\text{em}} = 456$ nm   |          | $\lambda_{\text{em}} = 588$ nm   |          |
|-----------------------------------|----------------------------------|----------|----------------------------------|----------|
|                                   | $\tau(\text{ns})(\beta)(\alpha)$ | $\chi^2$ | $\tau(\text{ns})(\beta)(\alpha)$ | $\chi^2$ |
| <b>AnPCN</b> in DMSO              | 3.52(100)(100)                   | 1.09     | -                                | -        |
| <b>AnPNMe<sub>2</sub></b> in DMSO | -                                | -        | 3.73(100)(100)                   | 1.14     |
| WLE solution in DMSO              | 3.52(100)(100)                   | 1.22     | 3.60(100)(100)                   | 1.29     |
| WLE gel                           | 3.64(100)(100)                   | 1.20     | 3.12(100)(100)                   | 1.21     |



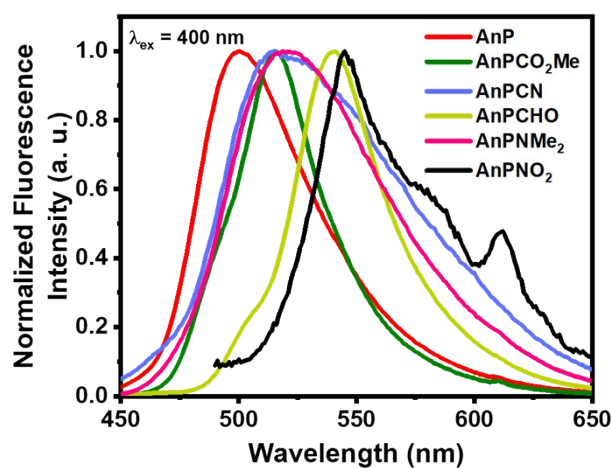

**Fig. S17.** Emission of the compounds in their solid powder forms.

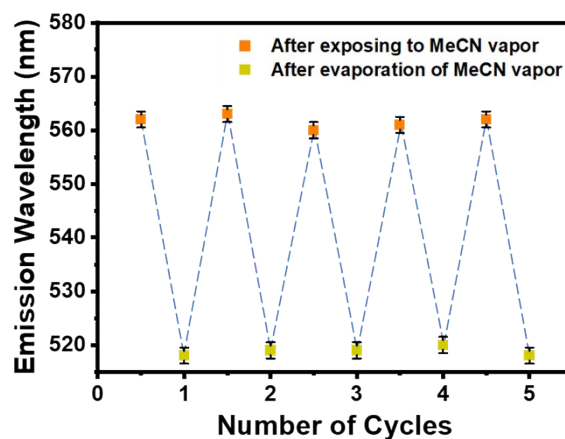

**Fig. S18.** Plot of emission wavelength vs number of repeated cycles of passing MeCN vapor through TLC plate containing **AnPNMe<sub>2</sub>** and evaporating the MeCN vapor (error =  $\pm 2$  nm).

- 1 T. Le Bahers, C. Adamo and I. Ciofini, *J. Chem. Theory Comput.*, 2011, **7**, 2498–2506.
- 2 E. von Lippert, *Zeitschrift für Elektrochemie*, 1957, **61**, 962–975.
- 3 J. R. Lakowicz, *Principles of fluorescence spectroscopy*, Springer, 2006.
- 4 H. Hoshino, S. Okada, H. Urakawa and K. Kajiwara, *Polym. Bull.*, 1996, **37**, 237–244.
